# Supplementary material
Source: PubMed Central journal article supplement (PMC2633373)

## Supplemental Figure Legends

Figure S1. Loss of NatA function does not alter the [*URE3*] phenotype. Wildtype (WT, NT64) and  $\Delta ard1$  [*URE3*] (+, SY1444) or [*ure-o*] (-) strains were spotted on rich media (YPD) or media lacking adenine (SD-ade) to monitor the [*URE3*] phenotype (adenine prototrophy).

Figure S2. *sup35K556E* accumulates to a wildtype level. Yeast lysates from a wildtype (WT, 74D-695) or *sup35K556E* (*K556E*, TRS64) were analyzed by SDS-PAGE and immunoblotting for Sup35 or Pkg1, as a loading control. The altered migration of Sup35K556E likely results from the change in charge due to the mutation.

Figure S3. Stop codon readthrough in wildtype and  $\Delta nat1$  heterozygous mutants. Shown are brightfield (DIC) and fluorescent (DsRed) images of crosses between a [*psi*<sup>-</sup>] strain expressing GST-UGA-DsRED-NLS (SY1181) and wildtype [*PSI*<sup>+</sup>], wildtype [*psi*<sup>-</sup>], or  $\Delta nat1$  [*PSI*<sup>+</sup>] (SY356) strains. The decreased level of readthrough in the heterozygous mutant indicates that loss of one copy of *NAT1* is sufficient to alter the [*PSI*<sup>+</sup>] phenotype, although readthrough is still detected relative to the [*psi*<sup>-</sup>] control.

Figure S4. Disruption of NatA does not alter chaperone expression profiles. Yeast lysates from a wildtype yeast strain (74D-694) grown at 30°C (WT) or at 37°C (HS) or from mutant strains  $\Delta ard1$  (TRS169, TRS220),  $\Delta nat1$  (SY356, SY357),

$\Delta ard1\Delta nat1$  (SY319, SY978) or  $\Delta hsp104$  grown at 30°C were analyzed by SDS-PAGE and immunoblotting for Hsp104, Ssa1/2, Ssa3/4 or Pgk1, as a loading control.

Figure S5. Ssa3/4 expression is not induced in *ssa1S2P* or *ssa2S2P $\Delta$ ssa2* strains. Yeast lysates from a wildtype strain grown at 30°C (WT) or at 37°C (HS) and from a *ssa1S2P* (*S2P*, SY1308) and a *ssa1S2P $\Delta$ ssa2* (*S2P*  $\Delta$ 2, SY1339) grown at 30°C were analyzed by SDS-PAGE and immunoblotting for Ssa3/4.

Figure S6. Loss of NatA function does not alter the number of [*PSI*<sup>+</sup>] propagons. Wildtype (white circles) and  $\Delta ard1\Delta nat1$  (black circles, SY319) [*PSI*<sup>+</sup>] strains were treated with GdnHCl over time in exponentially growing cultures and analyzed for the percentage of [*PSI*<sup>+</sup>] cells remaining at the indicated number of generations as described in the methods.

Figure S7. Expression of GST from P<sub>GPD</sub>GSTUGADsREDNLS is identical in wildtype and  $\Delta nat1$  strains. Lysates from a wildtype [*psi*<sup>-</sup>] (*NAT1*) strain or from wildtype [*psi*<sup>-</sup>] (*NAT1*, SY1181) or  $\Delta nat1$  (SY1180) strains expressing GSTUGADsREDNLS (+) were analyzed by SDS-PAGE and immunoblotting for GST or Pgk1, as a loading control. The similar accumulation of GST in wildtype and mutant strains indicates that expression of the reporter was not directly affected by loss of NatA function.

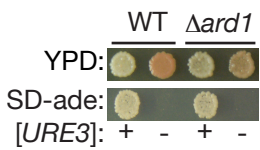

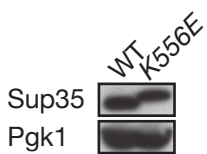

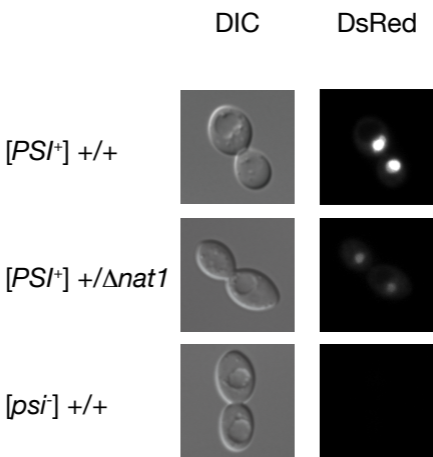

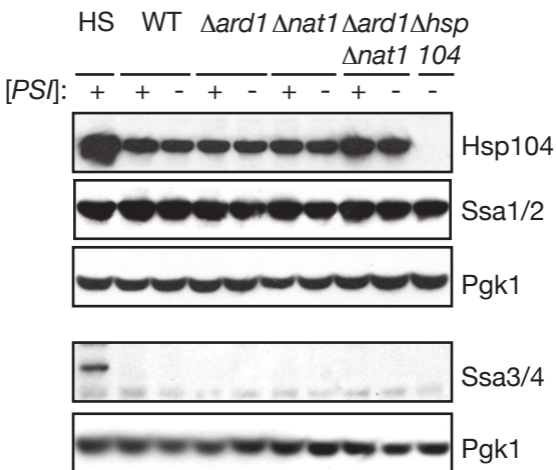

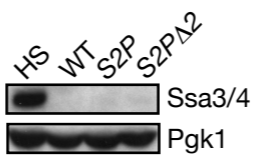

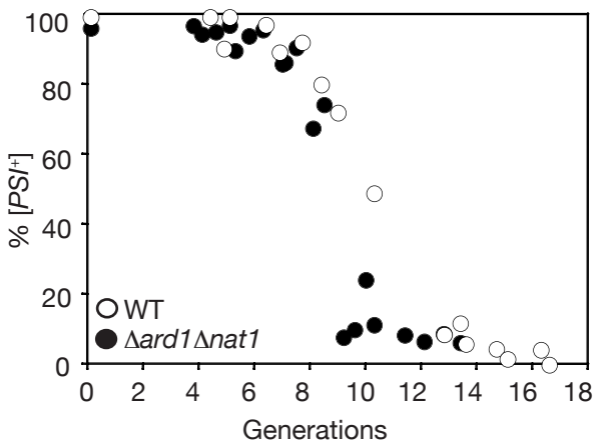



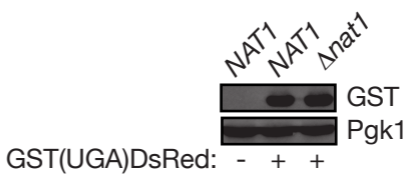

Supplement: E08-04-0436_1.pdf [file E08-04-0436_1.pdf]
